# Supplementary material
Source: PubMed Central journal article supplement (PMC7922241)

## Supplementary Online Content

Kowalski RG, Hammond FM, Weintraub AH, et al. Recovery of consciousness and functional outcome in moderate and severe traumatic brain injury. *JAMA Neurol*. Published online March 1, 2021. doi:10.1001/jamaneurol.2021.0084

**eTable 1.** Progression of Consciousness in Acute Care and Inpatient Rehabilitation Following TBI

**eTable 2.** Predictors of Recovery of Consciousness During Inpatient Rehabilitation Following TBI

**eTable 3.** Comparison of Patient Characteristics and Rehabilitation Admission Disordered Consciousness with Functional Independence at Discharge

**eTable 4.** Association of Patient and Clinical Characteristics with Functional Independence at Inpatient Rehabilitation Discharge in Patients with Disordered Consciousness at Start of Inpatient Rehabilitation

**eTable 5.** Predictors of Functional Independence at Rehabilitation Discharge in Patients with Disordered Consciousness at Start of Inpatient Rehabilitation

**eTable 6.** Predictors of Inpatient Rehabilitation Functional Outcome for Patients with Disordered Consciousness Following TBI

**eTable 7.** Comparison of Patient, Injury and Outcome Characteristics by Decade in Disordered Consciousness Following TBI

**eFigure 1.** Comparison of Disordered Consciousness at Inpatient Rehabilitation Admission and Functional Independence at Inpatient Rehabilitation Discharge

**eFigure 2.** Comparison of Change in Functional Status During Inpatient Rehabilitation

This supplementary material has been provided by the authors to give readers additional information about their work.

**eTable 1.** Progression of Consciousness in Acute Care and Inpatient Rehabilitation Following TBI

|                                                                            | All Patients<br>(N=17683) |
|----------------------------------------------------------------------------|---------------------------|
| <b>Change in consciousness during acute care<sup>1</sup></b>               |                           |
| Not following commands on initial ED evaluation <sup>2</sup>               | N=7624                    |
| No FC → Not FC                                                             | 1205 (16)                 |
| No FC → FC                                                                 | 6342 (83)                 |
| No FC → Missing                                                            | 77 (1)                    |
| Following commands on initial ED evaluation <sup>3</sup>                   | N=5834                    |
| FC → Not FC                                                                | 249 (4)                   |
| FC → FC                                                                    | 5506 (94)                 |
| FC → Missing                                                               | 79 (1)                    |
| Missing initial ED evaluation                                              | N=4225                    |
| Missing → Not FC                                                           | 604 (14)                  |
| Missing → FC                                                               | 3564 (84)                 |
| Missing → Missing                                                          | 57 (1)                    |
| <b>Change in consciousness during inpatient rehabilitation<sup>4</sup></b> |                           |
| Not following commands at rehabilitation admission <sup>5</sup>            | N=2058                    |
| No FC → Not FC                                                             | 363 (18)                  |
| No FC → FC                                                                 | 1674 (81)                 |
| No FC → Missing                                                            | 21 (1)                    |
| Following commands on rehabilitation admission <sup>6</sup>                | N=15412                   |
| FC → Not FC                                                                | 51 (1)                    |
| FC → FC                                                                    | 15320 (99)                |
| FC → Missing                                                               | 41 (1)                    |
| Missing rehabilitation admission evaluation                                | N=213                     |
| Missing → Not FC                                                           | 2 (1)                     |
| Missing → FC                                                               | 38 (18)                   |
| Missing → Missing                                                          | 173 (81)                  |

Data are N (%). TBI, traumatic brain injury; GCS<sub>M</sub>, Glasgow Coma Scale motor score; DRS<sub>M</sub>, Disability Rating Scale motor score; ED, emergency department; FC, following commands (GCS<sub>M</sub>=6, DRS<sub>M</sub>=0).

1. Δ Emergency department GCS<sub>M</sub> score to rehabilitation admission DRS<sub>M</sub> score.
2. GCS<sub>M</sub> <6 on initial emergency department evaluation.
3. GCS<sub>M</sub> =6 on initial emergency department evaluation.
4. Δ Inpatient rehabilitation admission DRS<sub>M</sub> score to rehabilitation discharge DRS<sub>M</sub> score.
5. DRS<sub>M</sub> >0 at inpatient rehabilitation admission.
6. DRS<sub>M</sub> =0 at inpatient rehabilitation admission.

**eTable 2.** Predictors of Recovery of Consciousness During Inpatient Rehabilitation Following TBI†

| Patient characteristic‡                   | AOR   | <i>p</i> | 95% Confidence Interval |
|-------------------------------------------|-------|----------|-------------------------|
| Older Age at Injury                       |       | NS       |                         |
| Sex (male)                                |       | NS       |                         |
| Higher velocity injury cause <sup>1</sup> |       | NS       |                         |
| Intraventricular hemorrhage               | 0.678 | 0.002    | 0.532, 0.863            |
| Non-cortical brain injury                 |       | NS       |                         |
| Cortical brain injury                     |       | NS       |                         |
| Intracranial mass effect <sup>2</sup>     | 0.759 | 0.027    | 0.595, 0.968            |

TBI, traumatic brain injury; AOR, adjusted odds ratio; NS, not significant.

†Persisting disordered consciousness is defined as failure to follow commands at time of discharge from inpatient rehabilitation.

‡Backward stepwise logistic regression (N=1,868 in model).

1. Motor vehicle collision.

2. Midline shift or compression of basal cisterns.

**eTable 3.** Comparison of Patient Characteristics and Rehabilitation Admission Disordered Consciousness with Functional Independence at Discharge

|                                               | Functional Outcome at Time of Rehabilitation Discharge                 |                                                                   |                                                                       |                                                                   |                                                                       |                                                                   |
|-----------------------------------------------|------------------------------------------------------------------------|-------------------------------------------------------------------|-----------------------------------------------------------------------|-------------------------------------------------------------------|-----------------------------------------------------------------------|-------------------------------------------------------------------|
|                                               | Dependent on Assistance <sup>1</sup>                                   |                                                                   | Semi-Independent <sup>2</sup>                                         |                                                                   | Independent <sup>3</sup>                                              |                                                                   |
|                                               | Not Following Commands at Rehabilitation Start<br>n=1210<br>59% of NFC | Following Commands at Rehabilitation Start<br>n=3144<br>20% of FC | Not Following Commands at Rehabilitation Start<br>n=494<br>24% of NFC | Following Commands at Rehabilitation Start<br>n=5564<br>36% of FC | Not Following Commands at Rehabilitation Start<br>n=309<br>15% of NFC | Following Commands at Rehabilitation Start<br>n=6377<br>41% of FC |
| <b>Patient Characteristics<sup>4</sup></b>    |                                                                        |                                                                   |                                                                       |                                                                   |                                                                       |                                                                   |
| <b>Demographics</b>                           |                                                                        |                                                                   |                                                                       |                                                                   |                                                                       |                                                                   |
| Age (years at injury onset) <sup>5</sup>      | 36 (23-55)                                                             | 49 (29-69)                                                        | 35 (23-51)                                                            | 41 (25-59)                                                        | 35 (24-49)                                                            | 35 (23-50)                                                        |
| Sex (male)                                    | 888/1210 (73)                                                          | 2194/3144 (70)                                                    | 381/494 (77)                                                          | 4028/5562 (72)                                                    | 256/309 (83)                                                          | 4841/6376 (76)                                                    |
| <b>Injury cause</b>                           |                                                                        |                                                                   |                                                                       |                                                                   |                                                                       |                                                                   |
| MVC vs. other                                 | 672/1209 (56)                                                          | 1328/3139 (42)                                                    | 292/494 (59)                                                          | 2810/5552 (51)                                                    | 144/307 (47)                                                          | 3205/6363 (50)                                                    |
| Fall vs. other                                | 289/1209 (24)                                                          | 1174/3143 (37)                                                    | 110/494 (22)                                                          | 1512/5561 (27)                                                    | 73/309 (24)                                                           | 1625/6375 (25)                                                    |
| <b>Acute hospital characteristics</b>         |                                                                        |                                                                   |                                                                       |                                                                   |                                                                       |                                                                   |
| Duration of acute care (days)                 | 30 (20-42)                                                             | 22 (11-34)                                                        | 20 (15-28)                                                            | 16 (9-25)                                                         | 18 (12-25)                                                            | 12 (8-20)                                                         |
| Craniotomy or craniectomy <sup>6</sup>        | 385/973 (40)                                                           | 816/2754 (30)                                                     | 106/376 (28)                                                          | 1172/4709 (25)                                                    | 54/204 (26)                                                           | 1028/4663 (22)                                                    |
| <b>Radiographic characteristics</b>           |                                                                        |                                                                   |                                                                       |                                                                   |                                                                       |                                                                   |
| IVH <sup>3</sup>                              | 540/1148 (47)                                                          | 972/3017 (32)                                                     | 161/461 (35)                                                          | 1299/5386 (24)                                                    | 66/264 (25)                                                           | 1076/6006 (18)                                                    |
| Intracranial mass effect <sup>6</sup>         | 654/1136 (58)                                                          | 1357/3006 (45)                                                    | 197/457 (43)                                                          | 2129/5363 (40)                                                    | 114/261 (44)                                                          | 2157/5978 (36)                                                    |
| Cortical contusion <sup>6</sup>               | 901/1148 (78)                                                          | 1942/3020 (64)                                                    | 335/461 (73)                                                          | 3481/5385 (65)                                                    | 189/264 (72)                                                          | 3798/6007 (63)                                                    |
| Non-cortical contusion <sup>6</sup>           | 416/1146 (36)                                                          | 714/3020 (23)                                                     | 136/461 (30)                                                          | 1008/5386 (19)                                                    | 45/264 (17)                                                           | 899/6002 (15)                                                     |
|                                               |                                                                        |                                                                   |                                                                       |                                                                   |                                                                       |                                                                   |
|                                               |                                                                        |                                                                   |                                                                       |                                                                   |                                                                       |                                                                   |
| <b>Functional Characteristics<sup>7</sup></b> |                                                                        |                                                                   |                                                                       |                                                                   |                                                                       |                                                                   |
| Admission FIM Total                           | 18 (18-21)                                                             | 31 (22-44)                                                        | 23 (18-33)                                                            | 51 (36-63)                                                        | 38 (22-59)                                                            | 70 (56-82)                                                        |
| Discharge FIM Total                           | 46 (23-66)                                                             | 68 (55-75)                                                        | 89 (84-93)                                                            | 90 (85-95)                                                        | 109 (104-114)                                                         | 110 (105-115)                                                     |
| Δ FIM Total                                   | +24 (+4 to +43)                                                        | +29 (+17 to +41)                                                  | +63 (+54 to +70)                                                      | +39 (+28 to +53)                                                  | +71 (+50 to +84)                                                      | +40 (+29 to +53)                                                  |
| PTA emergence                                 | 288/1166 (25)                                                          | 1854/3034 (61)                                                    | 323/478 (68)                                                          | 4767/5389 (88)                                                    | 254/299 (85)                                                          | 5912/6119 (97)                                                    |

Data are N (%), median (IQR). NFC, not following commands; FC, following commands; MVC, motor vehicle collision; IVH, intraventricular hemorrhage; FIM, Functional Independence Measure; PTA, post-traumatic amnesia.

1. FIM Total Score 18-79
2. FIM Total Score 80-99
3. FIM Total Score 100-126
4. Excludes 213 patients with no Disability Rating Scale motor score at inpatient admission.
5. For 157 patients age ≥89 years, age was set at 89
6. Neuroanatomic data are incomplete for decade 1988-1998.
7. Data are for inpatient rehabilitation period.

**eTable 4.** Association of Patient and Clinical Characteristics with Functional Independence at Inpatient Rehabilitation Discharge in Patients with Disordered Consciousness at Start of Inpatient Rehabilitation

| Patient Characteristics                  | Rehabilitation Discharge Function Independence Level |                                 |                                  | P      | OR    | 95% CI       |
|------------------------------------------|------------------------------------------------------|---------------------------------|----------------------------------|--------|-------|--------------|
|                                          | All Patients <sup>1</sup> (N=2058)                   | Dependent <sup>2</sup> (n=1704) | Independent <sup>3</sup> (n=309) |        |       |              |
| Demographics                             |                                                      |                                 |                                  |        |       |              |
| Age (years at injury onset) <sup>4</sup> | 35 (23-53)                                           | 35 (23-54)                      | 35 (24-49)                       | 0.218  |       |              |
| Sex (male)                               | 1555/2053 (76)                                       | 1269/1704 (74)                  | 256/309 (83)                     | 0.002  | 1.656 | 1.208, 2.269 |
| Race                                     |                                                      |                                 |                                  |        |       |              |
| White                                    | 1393/2057 (68)                                       | 1,166/1703 (68)                 | 201/309 (65)                     | 0.672  |       |              |
| Black                                    | 358/2057 (17)                                        | 297/1703 (17)                   | 54/309 (17)                      |        |       |              |
| Asian/Pacific Islander                   | 51/2057 (2)                                          | 41/1703 (2)                     | 9/209 (3)                        |        |       |              |
| Native American                          | 9/2057 (1)                                           | 8/1703 (1)                      | 1/209 (1)                        |        |       |              |
| Hispanic                                 | 219/2057 (11)                                        | 170/1703 (10)                   | 38/209 (12)                      |        |       |              |
| Other                                    | 27/2057 (1)                                          | 21/1703 (1)                     | 6/209 (2)                        |        |       |              |
| Acute Clinical characteristics           |                                                      |                                 |                                  |        |       |              |
| ED GCS Motor score <sup>5</sup>          |                                                      |                                 |                                  |        |       |              |
| 6. Following commands                    | 249/1454 (17)                                        | 190/1191 (16)                   | 55/234 (23)                      | <0.001 |       |              |
| 5. Localizes                             | 247/1454 (17)                                        | 190/1191 (16)                   | 52/234 (22)                      |        |       |              |
| 4. Withdraws                             | 240/1454 (17)                                        | 193/1191 (16)                   | 43/234 (18)                      |        |       |              |
| 3. Flexion                               | 100/1454 (7)                                         | 85/1191 (7)                     | 14/234 (6)                       |        |       |              |
| 2. Extension                             | 109/1454 (7)                                         | 97/1191 (8)                     | 10/234 (4)                       |        |       |              |
| 1. No response                           | 509/1454 (35)                                        | 436/1191 (37)                   | 60/234 (26)                      |        |       |              |
| Sedated, paralyzed                       | 530/1984 (27)                                        | 457/1648 (28)                   | 65/299 (22)                      |        |       |              |
| Unknown/missing                          | 74/2058 (4)                                          | 56/1704 (3)                     | 10/309 (3)                       |        |       |              |
| ED GCS <sub>M</sub> <6                   | 1205/1454 (83)                                       | 1001/1191 (84)                  | 179/234 (76)                     | 0.005  | 1.619 | 1.153, 2.274 |
| Injury cause                             |                                                      |                                 |                                  |        |       |              |
| MVC vs. other                            | 1124/2050 (55)                                       | 964/1703 (57)                   | 144/307 (47)                     | 0.002  | 0.677 | 0.531, 0.864 |
| Fall vs. other                           | 487/2052 (24)                                        | 399/1703 (23)                   | 73/309 (24)                      | 0.941  | 1.011 | 0.760, 1.345 |
| Acute hospital course characteristics    |                                                      |                                 |                                  |        |       |              |
| Duration of acute care (days)            | 25 (17-36)                                           | 26 (18-38)                      | 18 (12-25)                       | <0.001 |       |              |
| Craniotomy or craniectomy                | 559/1577 (35)                                        | 491/1349 (36)                   | 54/204 (26)                      | 0.006  | 0.629 | 0.452, 0.875 |
| Radiographic characteristics             |                                                      |                                 |                                  |        |       |              |
| Intracranial mass effect                 |                                                      |                                 |                                  |        |       |              |
| Compression or midline shift             | 984/1884 (52)                                        | 851/1593 (53)                   | 114/261 (44)                     | 0.003  | 0.676 | 0.519, 0.880 |
| Midline shift >5mm                       | 362/1884 (19)                                        | 324/1593 (20)                   | 30/261 (11)                      | 0.001  | 0.509 | 0.341, 0.758 |
| IPH or IVH                               |                                                      |                                 |                                  |        |       |              |
| Punctate/petechial hemorrhage            | 557/1903 (29)                                        | 499/1609 (31)                   | 52/264 (20)                      | <0.001 | 0.546 | 0.396, 0.752 |
| IVH                                      | 770/1903 (40)                                        | 701/1609 (44)                   | 66/264 (25)                      | <0.001 | 0.432 | 0.321, 0.580 |
| Extra-axial fluid collection             |                                                      |                                 |                                  |        |       |              |
| SAH or subdural                          | 1630/1904 (86)                                       | 1397/1610 (87)                  | 208/264 (78)                     | 0.001  | 0.566 | 0.408, 0.786 |
| Epidural                                 | 220/1900 (12)                                        | 186/1606 (12)                   | 32/264 (12)                      | 0.800  | 1.053 | 0.706, 1.571 |
| Cortical contusion                       | 1448/1903 (76)                                       | 1236/1609 (77)                  | 189/264 (72)                     | 0.065  | 0.760 | 0.568, 1.018 |
| Subcortical contusion                    | 603/1901 (32)                                        | 552/1607 (34)                   | 45/264 (17)                      | <0.001 | 0.393 | 0.280, 0.550 |

Data are N (%), median (IQR). ED, emergency department; GCS, Glasgow Coma Scale; GCS<sub>M</sub>, Glasgow Coma Scale motor score; MVC, motor vehicle collision; IPH, intraparenchymal hemorrhage; IVH, intraventricular hemorrhage; SAH, subarachnoid hemorrhage.

1. Disability Rating Scale motor score>0 (not following commands) at inpatient rehabilitation admission.
2. FIM Total Score 18-99 at rehabilitation discharge.
3. FIM Total Score 100-126 at rehabilitation discharge.
4. Age ≥89 years is set at 89.
5. Emergency Department GCS available for 1,984 (96%) patients.

**eTable 5.** Predictors of Functional Independence<sup>†</sup> at Rehabilitation Discharge in Patients with Disordered Consciousness<sup>‡</sup> at Start of Inpatient Rehabilitation

| Patient characteristic <sup>1</sup>       | AOR   | <i>p</i> | 95% Confidence Interval |
|-------------------------------------------|-------|----------|-------------------------|
| Older Age at Injury                       | 0.984 | <0.001   | 0.976, 0.992            |
| Sex (male)                                | 1.641 | 0.005    | 1.157, 2.328            |
| Higher velocity injury cause <sup>1</sup> | 0.621 | 0.002    | 0.461, 0.836            |
| Intraventricular hemorrhage               | 0.491 | <0.001   | 0.360, 0.671            |
| Non-cortical brain injury                 | 0.448 | <0.001   | 0.315, 0.639            |
| Cortical brain injury                     |       | NS       |                         |
| Intracranial mass effect <sup>2</sup>     | 0.673 | 0.005    | 0.511, 0.886            |

TBI, traumatic brain injury; AOR, adjusted odds ratio; NS, not significant.

<sup>†</sup>Functional independence is FIM Total Score  $\geq 100$  at rehabilitation discharge

<sup>‡</sup>Disordered consciousness is failure to follow commands at time of inpatient rehabilitation admission.

1. Backward stepwise logistic regression (N=1,848 in model).

2. Motor vehicle collision.

3. Midline shift or compression of basal cisterns.

**eTable 6.** Predictors of Inpatient Rehabilitation Functional Outcome for Patients with Disordered Consciousness Following TBI†

| Outcome and predictors‡                | Unstandardized $\beta$ | SE    | Standardized $\beta$ | <i>P</i> | 95% CI for $\beta$ | Adjusted R <sup>2</sup> |
|----------------------------------------|------------------------|-------|----------------------|----------|--------------------|-------------------------|
| Discharge FIM Total Score <sup>1</sup> |                        |       |                      |          |                    | 0.078                   |
| (Constant)                             | 79.967                 | 3.036 |                      | <0.001   | 74.013, 85.922     |                         |
| Older age                              | -0.102                 | 0.040 | -0.063               | 0.011    | -0.181, -0.023     |                         |
| Sex (male)                             | 3.971                  | 1.586 | 0.056                | 0.012    | 0.862, 7.081       |                         |
| Injury type (MVC)                      | -1.381                 | 1.544 | -0.022               | 0.371    | -4.408, 1.647      |                         |
| Intraventricular hemorrhage            | -9.879                 | 1.442 | -0.159               | <0.001   | -12.706, -7.051    |                         |
| Midline shift or cistern compression   | -8.722                 | 1.395 | -0.143               | <0.001   | -11.458, -5.987    |                         |
| Subcortical contusion                  | -8.658                 | 1.530 | -0.132               | <0.001   | -11.658, -5.657    |                         |
| Cortical contusion                     | -1.839                 | 1.635 | -0.026               | 0.261    | -5.046, 1.368      |                         |
| $\Delta$ FIM Total Score <sup>2</sup>  |                        |       |                      |          |                    | 0.046                   |
| (Constant)                             | 49.516                 | 2.735 |                      | <0.001   | 44.153, 54.880     |                         |
| Older age                              | -0.132                 | 0.036 | -0.094               | <0.001   | -0.203, -0.061     |                         |
| Sex (male)                             | 2.755                  | 1.424 | 0.045                | 0.053    | -0.038, 5.547      |                         |
| Injury type (MVC)                      | 1.216                  | 1.390 | 0.023                | 0.381    | -1.509, 3.942      |                         |
| Intraventricular hemorrhage            | -5.041                 | 1.300 | -0.093               | <0.001   | -7.591, -2.492     |                         |
| Midline shift or cistern compression   | -6.605                 | 1.254 | -0.124               | <0.001   | -9.063, -4.146     |                         |
| Subcortical contusion                  | -6.230                 | 1.378 | -0.109               | <0.001   | -8.932, -3.527     |                         |
| Cortical contusion                     | 0.254                  | 1.471 | 0.004                | 0.863    | -2.631, 3.139      |                         |

TBI, traumatic brain injury; FIM, Functional Independence Measure; MVC, motor vehicle collision.

†Disordered consciousness is defined as failure to follow commands at time of inpatient rehabilitation admission.

‡Multivariable linear regression.

1. Assessed at time of inpatient rehabilitation discharge (N=1,848 in model).

2. Change in FIM Total score between rehabilitation admission and rehabilitation discharge (N=1,800 in model).

**eTable 7.** Comparison of Patient, Injury and Outcome Characteristics by Decade in Disordered Consciousness Following TBI

|                                           | Injury Year                                            |                                                     |                                                         |                                                     |                                                       |                                                     |
|-------------------------------------------|--------------------------------------------------------|-----------------------------------------------------|---------------------------------------------------------|-----------------------------------------------------|-------------------------------------------------------|-----------------------------------------------------|
|                                           | 1988 to 1998                                           |                                                     | 1999 to 2009                                            |                                                     | 2010 to 2019                                          |                                                     |
|                                           | Not Following <sup>1</sup><br>Commands<br>n=173<br>14% | Following<br>Commands <sup>1</sup><br>n=1056<br>86% | Not Following<br>Commands <sup>1</sup><br>n=1146<br>14% | Following<br>Commands <sup>1</sup><br>n=6936<br>86% | Not Following<br>Commands <sup>1</sup><br>n=739<br>9% | Following<br>Commands <sup>1</sup><br>n=7420<br>91% |
| Patient Characteristics <sup>2</sup>      |                                                        |                                                     |                                                         |                                                     |                                                       |                                                     |
| Demographics                              |                                                        |                                                     |                                                         |                                                     |                                                       |                                                     |
| Age (years at injury onset) <sup>3</sup>  | 34 (23-43)                                             | 32 (23-43)                                          | 34 (22-51)                                              | 37 (23-53)                                          | 38 (25-58)                                            | 44 (27-61)                                          |
| Sex (male)                                | 134/173 (77)                                           | 801/1056 (76)                                       | 866/1146 (76)                                           | 5095/6935 (73)                                      | 555/734 (76)                                          | 5403/7417 (73)                                      |
| Injury cause                              |                                                        |                                                     |                                                         |                                                     |                                                       |                                                     |
| MVC vs. other                             | 72/172 (42)                                            | 514/1053 (49)                                       | 683/1145 (60)                                           | 3740/6925 (54)                                      | 369/733 (50)                                          | 3273/7401 (44)                                      |
| Fall vs. other                            | 17/172 (10)                                            | 145/1056 (14)                                       | 243/1146 (21)                                           | 1650/6931 (24)                                      | 227/734 (31)                                          | 2584/7417 (35)                                      |
| Acute hospital characteristics            |                                                        |                                                     |                                                         |                                                     |                                                       |                                                     |
| Duration of acute care (days)             | 24 (16-41)                                             | 16 (9-26)                                           | 25 (17-36)                                              | 16 (9-25)                                           | 24 (17-35)                                            | 15 (8-25)                                           |
| Craniotomy or craniectomy <sup>4</sup>    | 1/5 (20)                                               | 4/17 (24)                                           | 295/847 (35)                                            | 1179/4887 (24)                                      | 263/725 (36)                                          | 1875/7395 (25)                                      |
| Radiographic characteristics <sup>4</sup> |                                                        |                                                     |                                                         |                                                     |                                                       |                                                     |
| IVH                                       | 24/85 (28)                                             | 93/693 (13)                                         | 477/1125 (42)                                           | 1562/6798 (23)                                      | 269/693 (39)                                          | 1760/7206 (24)                                      |
| Intracranial mass effect                  | 38/84 (45)                                             | 268/686 (39)                                        | 611/1108 (55)                                           | 2794/6747 (41)                                      | 335/692 (48)                                          | 2685/7197 (37)                                      |
| Cortical contusion                        | 56/85 (66)                                             | 407/693 (59)                                        | 860/1125 (76)                                           | 4409/6798 (65)                                      | 532/693 (77)                                          | 4593/7209 (64)                                      |
| Non-cortical contusion                    | 22/85 (26)                                             | 102/693 (15)                                        | 362/1124 (32)                                           | 1227/6797 (18)                                      | 219/692 (32)                                          | 1333/7205 (19)                                      |
|                                           |                                                        |                                                     |                                                         |                                                     |                                                       |                                                     |
| Outcome Characteristics <sup>5</sup>      |                                                        |                                                     |                                                         |                                                     |                                                       |                                                     |
| Admission FIM Total                       | 23 (18-44)                                             | 58 (37-79)                                          | 20 (18-27)                                              | 57 (37-73)                                          | 18 (18-26)                                            | 52 (35-67)                                          |
| Discharge FIM Total                       | 90 (59-105)                                            | 106 (92-114)                                        | 73 (39-91)                                              | 98 (85-109)                                         | 66 (32-85)                                            | 92 (80-104)                                         |
| Δ FIM Total                               | +46 (+24 to +68)                                       | +41 (+27 to +57)                                    | +44 (+16 to +62)                                        | +37 (+27 to +61)                                    | +39 (+13 to +58)                                      | +37 (+27 to +49)                                    |
| Functionally independent <sup>6,7</sup>   | 59/165 (36)                                            | 623/996 (63)                                        | 178/1129 (16)                                           | 3210/6777 (47)                                      | 72/719 (10)                                           | 2544/7312 (35)                                      |
| PTA emergence                             | 79/158 (50)                                            | 752/936 (80)                                        | 501/1102 (45)                                           | 5692/6643 (86)                                      | 302/716 (42)                                          | 6347/7254 (87)                                      |
|                                           |                                                        |                                                     |                                                         |                                                     |                                                       |                                                     |

Data are N (%), median (IQR). MVC, motor vehicle collision; IVH, intraventricular hemorrhage; FIM, Functional Independence Measure; PTA, post-traumatic amnesia.

1. Disability Rating Scale motor score at time of inpatient rehabilitation admission.
2. Excludes 213 patients with no Disability Rating Scale motor score at inpatient rehabilitation admission.
3. Age >89 years is set at 89.
4. Neuroanatomic data are incomplete for decade 1988-1998.
5. Data are for inpatient rehabilitation period.
6. FIM Total Score 100-126.
7. Data exclude 372 patients with no discharge FIM total scores.



**eFigure 1.** Comparison of Disordered Consciousness at Inpatient Rehabilitation Admission and Functional Independence at Inpatient Rehabilitation Discharge

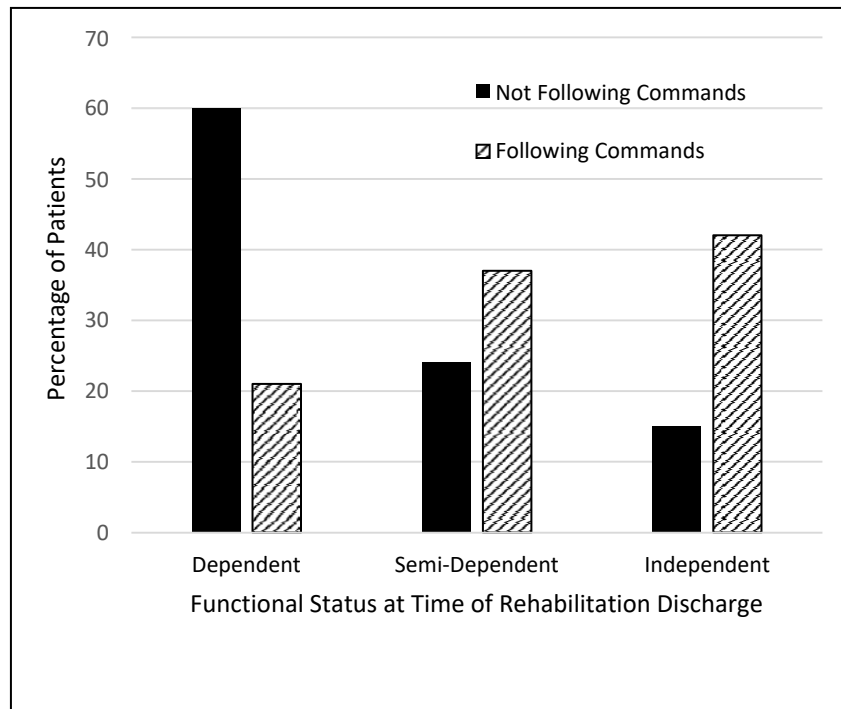

**eFigure 2.** Comparison of Change in Functional Status During Inpatient Rehabilitation

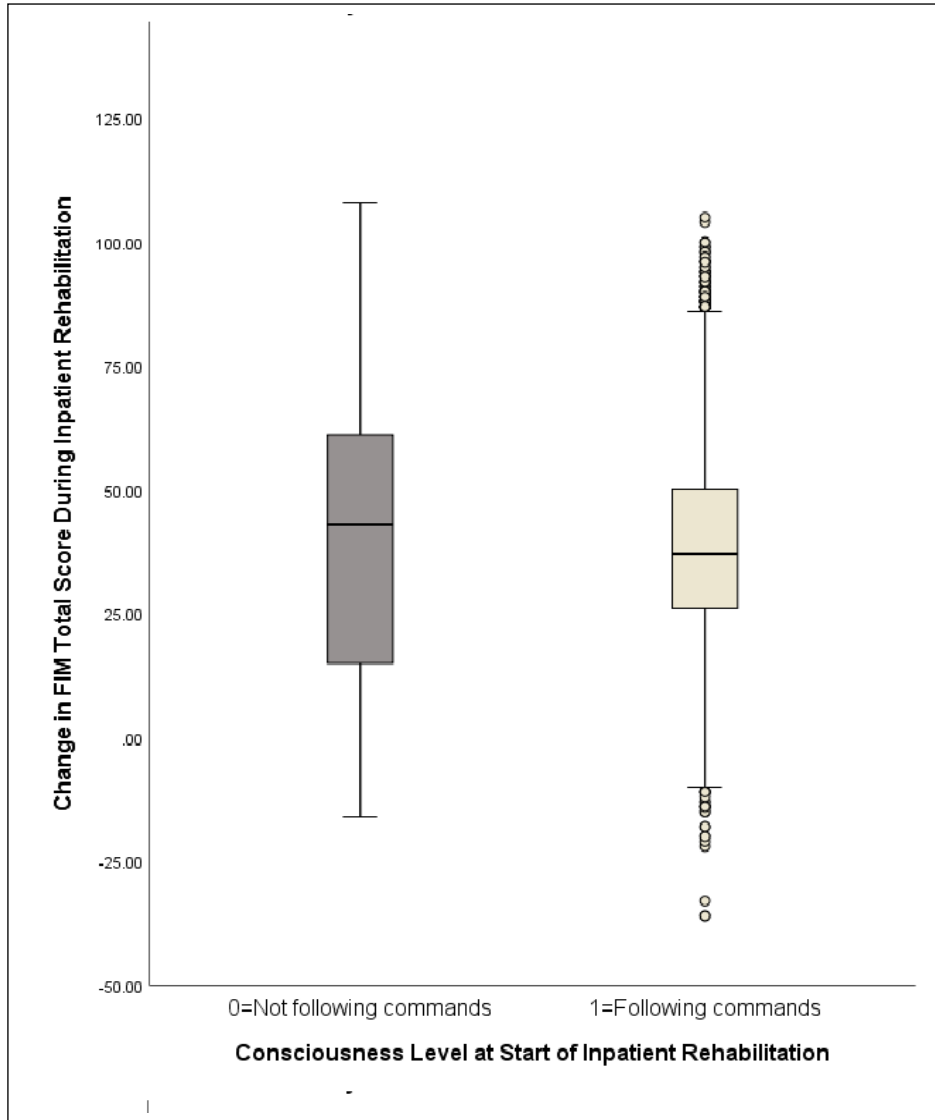

Supplement: jamaneurol-e210084-s001.pdf [file jamaneurol-e210084-s001.pdf]
